# Supplementary material for: Efficacy and Safety of Botulinum Toxin Type A for Limb Spasticity after Stroke: A Meta-Analysis of Randomized Controlled Trials
Source: Hindawi journal article supplement (doi:10.1155/2019/8329306), 2019-04-07
Supplement: f2 [file 8329306.f2.pdf]

## upper limb

| study          | smd   | smdl  | smdu  | group    |
|----------------|-------|-------|-------|----------|
| Simpson 1996   | -1.26 | -2.26 | -0.27 | 4 week   |
| Simpson 1996   | -0.99 | -1.95 | -0.03 | 6 week   |
| Simpson 1996   | -0.51 | -1.43 | 0.4   | 8 week   |
| Simpson 1996   | 0.07  | -0.83 | 0.97  | >12 week |
| Hesse 1998     | -0.67 | -1.83 | 0.5   | 4 week   |
| Hesse 1998     | -0.58 | -1.74 | 0.58  | 6 week   |
| Hesse 1998     | -0.5  | -1.65 | 0.65  | 12 week  |
| Brashear 2002  | -0.93 | -1.3  | -0.56 | 6 week   |
| Brashear 2002  | -0.66 | -1.02 | -0.3  | 12 week  |
| Childers 2004  | -1.2  | -1.83 | -0.58 | 4 week   |
| Childers 2004  | -1.13 | -1.75 | -0.51 | 6 week   |
| Childers 2004  | -1.01 | -1.62 | -0.39 | 8 week   |
| Simpson 2009   | -1.05 | -1.72 | -0.38 | 4 week   |
| Meythaler 2009 | 0     | -0.86 | 0.86  | 6 week   |
| Meythaler 2009 | -0.27 | -1.14 | 0.59  | 12 week  |
| Mccrory 2009   | -0.99 | -1.43 | -0.56 | 8 week   |
| Mccrory 2009   | -1.11 | -1.55 | -0.66 | >12 week |
| Kaji 2010      | -0.63 | -1.11 | -0.14 | 4 week   |
| Kaji 2010      | -0.73 | -1.24 | -0.23 | 8 week   |
| Kaji 2010      | -0.68 | -1.18 | -0.18 | 12 week  |
| Rosales 2012   | -1.31 | -1.65 | -0.97 | 4 week   |
| Gracies 2015   | -1.24 | -1.58 | -0.9  | 4 week   |
| Gracies 2015   | -0.74 | -1.07 | -0.41 | 12 week  |
| Elovic 2016    | -0.52 | -0.78 | -0.26 | 4 week   |
| Prazeres 2018  | 0.11  | -0.74 | 0.97  | 12 week  |
| Prazeres 2018  | -0.36 | -1.22 | 0.51  | >12 week |

## Muscle tone

| study          | smd   | smdl  | smdu  | publication year | mean age | percentage male | time since event | study quality |
|----------------|-------|-------|-------|------------------|----------|-----------------|------------------|---------------|
| Simpson 1996   | 0.07  | -0.83 | 0.97  | <2010            | >55      | <60             | >24              | low           |
| Hesse 1998     | -0.5  | -1.65 | 0.65  | <2010            | <55      | >60             | <24              | low           |
| Brashear 2002  | -0.66 | -1.02 | -0.3  | <2010            | >55      | <60             | >24              | high          |
| Childers 2004  | -1.01 | -1.62 | -0.39 | <2010            | >55      | >60             | >24              | high          |
| Simpson 2009   | -1.05 | -1.72 | -0.38 | <2010            | <55      | <60             | <24              | high          |
| Meythaler 2009 | -0.27 | -1.14 | 0.59  | <2010            | <55      | >60             | <24              | high          |
| Mccrory 2009   | -1.11 | -1.55 | -0.66 | <2010            | >55      | >60             | >24              | high          |
| Kaji 2010      | -0.68 | -1.18 | -0.18 | >2010            | >55      | >60             | >24              | high          |
| Rosales 2012   | -1.31 | -1.65 | -0.97 | >2010            | >55      | >60             | <24              | high          |
| Gracies 2015   | -0.74 | -1.07 | -0.41 | >2010            | <55      | >60             | >24              | high          |
| Elovic 2016    | -0.52 | -0.78 | -0.26 | >2010            | >55      | <60             | >24              | high          |
| Prazeres 2018  | -0.36 | -1.22 | 0.51  | >2010            | <55      | >60             | >24              | high          |

| study         | smd  | smdl  | smdu | group   |
|---------------|------|-------|------|---------|
| Simpson 1996  | 0.95 | -0    | 1.91 | 4 week  |
| Simpson 1996  | 2.49 | 1.26  | 3.72 | 6 week  |
| Simpson 1996  | 0.11 | -0.79 | 1.01 | 12 week |
| Brashear 2002 | 0.54 | 0.19  | 0.9  | 4 week  |
| Brashear 2002 | 0.94 | 0.57  | 1.31 | 6 week  |
| Kaji 2010     | 0.48 | -0    | 0.96 | 4 week  |
| Kaji 2010     | 0.66 | 0.15  | 1.16 | 6 week  |
| Kaji 2010     | 0.22 | -0.27 | 0.71 | 12 week |

active upper limb function

| study         | smd  | smdl  | smdu | publication year | mean age | percentage male | time since event | study quality |
|---------------|------|-------|------|------------------|----------|-----------------|------------------|---------------|
| Simpson 1996  | 0.11 | -0.79 | 1.01 | <2010            | >55      | <60             | >24              | low           |
| Brashear 2002 | 0.94 | 0.57  | 1.31 | <2010            | >55      | <60             | >24              | high          |
| Kaji 2010     | 0.22 | -0.27 | 0.71 | >2010            | >55      | >60             | >24              | high          |

| study         | smd  | smdl  | smdu | group   |
|---------------|------|-------|------|---------|
| Simpson 1996  | 2.14 | 0.99  | 3.29 | 6 week  |
| Simpson 1996  | 0.87 | -0.08 | 1.82 | 12 week |
| Brashear 2002 | 1.39 | 1     | 1.78 | 6 week  |
| Brashear 2002 | 0.58 | 0.22  | 0.94 | 12 week |
| Childers 2004 | 1.01 | 0.39  | 1.62 | 4 week  |
| Childers 2004 | 1.06 | 0.44  | 1.67 | 6 week  |
| Kaji 2010     | 0.95 | 0.45  | 1.44 | 4 week  |
| Kaji 2010     | 0.53 | 0.03  | 1.02 | 6 week  |
| Kaji 2010     | 0.36 | -0.13 | 0.85 | 12 week |
| Gracies 2015  | 1.14 | 0.8   | 1.48 | 4 week  |
| Gracies 2015  | 0.44 | 0.12  | 0.77 | 12 week |
| Elovic 2016   | 0.43 | 0.17  | 0.69 | 4 week  |

physician global assessments

| study         | smd  | smdl  | smdu | publication year | mean age | percentage male | time since event | study quality |
|---------------|------|-------|------|------------------|----------|-----------------|------------------|---------------|
| Simpson 1996  | 0.87 | -0.08 | 1.82 | <2010            | >55      | <60             | >24              | low           |
| Brashear 2002 | 0.58 | 0.22  | 0.94 | <2010            | >55      | <60             | >24              | high          |
| Childers 2004 | 1.06 | 0.44  | 1.67 | <2010            | >55      | >60             | >24              | high          |
| Kaji 2010     | 0.36 | -0.13 | 0.85 | >2010            | >55      | >60             | >24              | high          |
| Gracies 2015  | 0.44 | 0.12  | 0.77 | >2010            | <55      | >60             | >24              | high          |
| Elovic 2016   | 0.43 | 0.17  | 0.69 | >2010            | >55      | <60             | >24              | high          |

| study         | rr   | rrl  | rru   | ADR |
|---------------|------|------|-------|-----|
| Smith 2000    | 1.75 | 0.1  | 32.18 |     |
| Bakheit 2000  | 0.6  | 0.17 | 2.19  |     |
| Bhakta 2000   | 0.67 | 0.12 | 2.57  |     |
| Childers 2004 | 4.5  | 0.26 | 78.59 |     |
| Yelnik 2007   | 3    | 0.37 | 24.17 |     |
| Mccrory 2009  | 0.58 | 0.14 | 2.47  |     |
| Kanovsky 2009 | 0.68 | 0.12 | 3.98  |     |
| Kaji 2010     | 0.69 | 0.16 | 2.9   |     |
| Rosales 2012  | 2.07 | 0.39 | 11.02 |     |
| Wolf 2012     | 3.23 | 0.14 | 72.46 |     |
| Gracies 2015  | 3.25 | 0.75 | 14.06 |     |
| Elovic 2016   | 2.04 | 0.44 | 9.43  |     |

| study         | smd   | smdl  | smdu  | group   |
|---------------|-------|-------|-------|---------|
| Bhakta 2000   | -0.4  | -0.48 | -0.32 | 6 week  |
| Bhakta 2000   | -0.3  | -0.43 | -0.17 | 12 week |
| Brashear 2002 | -0.63 | -0.9  | -0.36 | 6 week  |
| Brashear 2002 | -0.42 | -0.74 | -0.1  | 12 week |
| Simpson 2009  | -0.46 | -1.15 | 0.23  | 6 week  |
| Kaji 2010     | -0.51 | -0.83 | -0.19 | 4 week  |
| Kaji 2010     | -0.41 | -0.75 | -0.07 | 6 week  |
| Kaji 2010     | -0.38 | -0.68 | -0.08 | 12 week |
| Gracies 2015  | -0.2  | -0.42 | 0.02  | 4 week  |
| Gracies 2015  | -0.2  | -0.41 | 0.01  | 12 week |

disability assessment scale

| study         | smd   | smdl  | smdu  | publication year | mean age | percentage male | time since event | study quality |
|---------------|-------|-------|-------|------------------|----------|-----------------|------------------|---------------|
| Bhakta 2000   | -0.3  | -0.43 | -0.17 | <2010            | >55      | <60             | >24              | high          |
| Brashear 2002 | -0.42 | -0.74 | -0.1  | <2010            | >55      | <60             | >24              | high          |
| Simpson 2009  | -0.46 | -1.15 | 0.23  | <2010            | <55      | <60             | <24              | high          |
| Kaji 2010     | -0.38 | -0.68 | -0.08 | >2010            | >55      | >60             | >24              | high          |
| Gracies 2015  | -0.2  | -0.41 | 0.01  | >2010            | <55      | >60             | >24              | high          |

**lower limb**

| study        | smd   | smdl  | smdu  | group   |
|--------------|-------|-------|-------|---------|
| Burbaud 1996 | 2.66  | 1.48  | 3.84  | 4 week  |
| Burbaud 1996 | -0.21 | -1.03 | 0.62  | 12 week |
| Kaji 2010    | 0.63  | 0.27  | 1     | 4 week  |
| Kaji 2010    | 0.25  | -0.11 | 0.61  | 12 week |
| Fietzek 2014 | 0.78  | 0.22  | 1.35  | 4 week  |
| Fietzek 2014 | 0.72  | 0.16  | 1.28  | 12 week |
| Ding 2015    | 0.12  | -0.36 | 0.59  | 4 week  |
| Ding 2015    | 0.7   | 0.21  | 1.19  | 12 week |
| Ding 2015    | 0.02  | -0.46 | 0.49  | >12     |
| Ding 2017    | -0.24 | -0.68 | 0.2   | 4 week  |
| Ding 2017    | -0.15 | -0.59 | 0.29  | 8 week  |
| Ding 2017    | -1.4  | -1.89 | -0.91 | 12 week |

**Muscle tone**

| study        | smd   | smdl  | smdu  | publication year | mean age | percentage male | time since event | study quality |
|--------------|-------|-------|-------|------------------|----------|-----------------|------------------|---------------|
| Burbaud 1996 | -0.21 | -1.03 | 0.62  | <2010            | <55      | >60             | >24              | low           |
| Kaji 2010    | 0.25  | -0.11 | 0.61  | >2010            | <55      | >60             | <24              | high          |
| Fietzek 2014 | 0.72  | 0.16  | 1.28  | >2010            | <55      | <60             | <24              | high          |
| Ding 2015    | 0.02  | -0.46 | 0.49  | >2010            | >55      | <60             | <24              | low           |
| Ding 2017    | -1.4  | -1.89 | -0.91 | >2010            | >55      | <60             | <24              | low           |

| study        | smd   | smdl  | smdu  | group   |
|--------------|-------|-------|-------|---------|
| Burbaud 1996 | 1.5   | -1.61 | 4.61  | 4 week  |
| Burbaud 1996 | 1.2   | -1.88 | 4.28  | 12 week |
| Tao 2015     | 2.4   | 1.16  | 3.64  | 4 week  |
| Tao 2015     | 0.1   | -2.54 | 2.74  | 8 week  |
| Ding 2015    | -0.4  | -2.28 | 1.48  | 4 week  |
| Ding 2015    | 7.59  | 6.73  | 8.45  | 12 week |
| Ding 2015    | 9.04  | 7.89  | 10.19 | >12     |
| Ding 2017    | 0.47  | 0.13  | 0.81  | 4 week  |
| Ding 2017    | -0.57 | -0.9  | -0.24 | 8 week  |
| Ding 2017    | 8.32  | 7.98  | 8.66  | 12 week |

Fugl-Meyer score

| study        | smd  | smdl  | smdu  | publication year | mean age | percentage male | time since event | study quality |
|--------------|------|-------|-------|------------------|----------|-----------------|------------------|---------------|
| Burbaud 1996 | 1.2  | -1.88 | 4.28  | <2010            | <55      | >60             | >24              | low           |
| Tao 2015     | 0.1  | -2.54 | 2.74  | >2010            | >55      | >60             | <24              | low           |
| Ding 2015    | 9.04 | 7.89  | 10.19 | >2010            | >55      | <60             | <24              | low           |
| Ding 2017    | 8.32 | 7.98  | 8.66  | >2010            | >55      | <60             | <24              | low           |

| study        | smd   | smdl  | smdu | group   |
|--------------|-------|-------|------|---------|
| Burbaud 1996 | 0.06  | -0.01 | 0.13 | 4 week  |
| Burbaud 1996 | -0.02 | -0.09 | 0.06 | 12 week |
| Pittock 2003 | 0     | -0.04 | 0.05 | 4 week  |
| Pittock 2003 | 0.01  | -0.03 | 0.05 | 8 week  |
| Pittock 2003 | 0     | -0.04 | 0.04 | 12 week |
| Kaji 2010    | -0.01 | -0.07 | 0.04 | 4 week  |
| Kaji 2010    | -0.03 | -0.16 | 0.11 | 8 week  |
| Kaji 2010    | 0     | -0.08 | 0.07 | 12 week |
| Tao 2015     | 0.24  | 0.12  | 0.36 | 8 week  |
| Ding 2017    | 0.02  | -0.09 | 0.13 | 4 week  |
| Ding 2017    | 0.09  | -0.01 | 0.19 | 8 week  |
| Ding 2017    | 0.17  | 0.06  | 0.28 | 12 week |

#### Gait speed

| study        | smd   | smdl  | smdu | publication year | mean age | percentage male | time since event | study quality |
|--------------|-------|-------|------|------------------|----------|-----------------|------------------|---------------|
| Burbaud 1996 | -0.02 | -0.09 | 0.06 | <2010            | <55      | >60             | >24              | low           |
| Pittock 2003 | 0     | -0.04 | 0.04 | <2010            | >55      | .               | <24              | high          |
| Kaji 2010    | 0     | -0.08 | 0.07 | >2010            | <55      | >60             | <24              | high          |
| Tao 2015     | 0.24  | 0.12  | 0.36 | >2010            | >55      | >60             | <24              | low           |
| Ding 2017    | 0.17  | 0.06  | 0.28 | >2010            | >55      | <60             | <24              | low           |

| study        | event | n <sub>event</sub> | cevent | cnevent | ADR |
|--------------|-------|--------------------|--------|---------|-----|
| Pittock 2003 | 52    | 127                | 16     | 39      |     |
| Kaji 2010    | 7     | 51                 | 7      | 55      |     |
| Dunne 2012   | 11    | 43                 | 11     | 18      |     |
| Wein         | 154   | 77                 | 118    | 108     |     |
| Kaji 2010    | 7     | 51                 | 7      | 55      |     |
| Dunne 2012   | 11    | 43                 | 11     | 18      |     |
| Wein         | 154   | 77                 | 118    | 108     |     |
